# Supplementary material
Source: publisher site journal article supplement (https://www.degruyterbrill.com/publication/isbn/9783110598025/downloadAsset/9783110598025_Zusatzmaterialien_Dozent_innen.pdf)
Supplement: Supplementary file 1 [file 9783110598025_Zusatzmaterialien_Dozent_innen.pdf]

Sehr geehrte Dozentinnen und Dozenten,

es freut uns, dass Sie Interesse am Zusatzmaterial für diesen Titel haben. Um die PDF-Dateien zu erhalten, wenden Sie sich bitte mit Ihrer Anfrage direkt an Herrn Dr. Stefan Giesen:

[stefan.giesen@degruyter.com](mailto:stefan.giesen@degruyter.com)

Vielen Dank!
